# Supplementary material for: Chemical Constituents from Hericium erinaceus Promote Neuronal Survival and Potentiate Neurite Outgrowth via the TrkA/Erk1/2 Pathway
Source: MDPI journal article supplement (doi:10.3390/ijms18081659), 2017-07-30
Supplement: s1 [file s1]

[ Mass Spectrum ]  
 Data : FUKUYAMA-CL06-May-2016.002 Date : 06-May-2016 15:02  
 Sample : ZCC-141211(CH4)  
 Note : MStation  
 Inlet : Direct Ion Mode : CI+  
 Spectrum Type : Normal Ion [MF-Linear]  
 RT : 0.44 min Scan# : 17-k(74)[k=1.0]  
 BP : m/z 168 Int. : 81.00 (849376)  
 Output m/z range : 35 to 500 Cut Level : 0.00 %

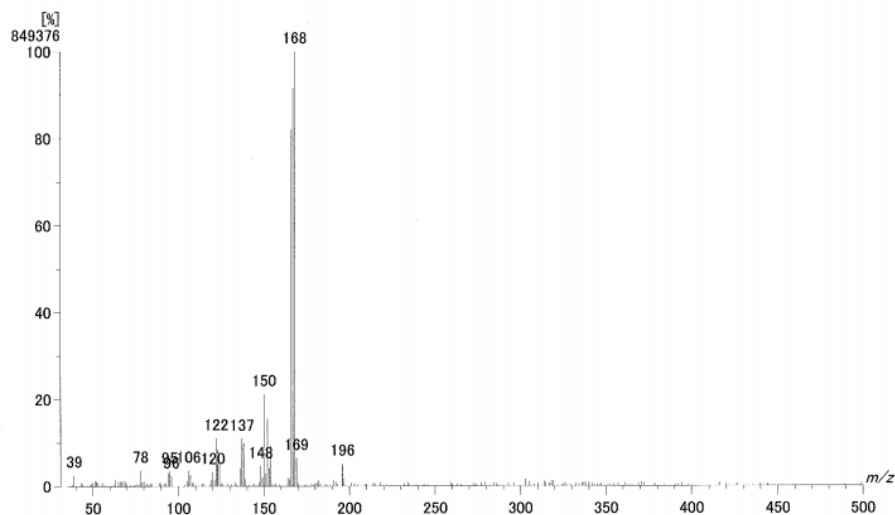

Data : FUKUYAMA-CIHR.26-Jul-2016.001 Date : 26-Jul-2016 10:57  
 Instrument : MStation  
 Sample : ZCC-141211  
 Note : MStation  
 Inlet : Direct Ion Mode : CI+  
 RT : 0.40 min Scan# : 9  
 Elements : C 150/0, H 250/0, N 1/0, O 50/0  
 Mass Tolerance : 5mmu  
 Unsaturation (U.S.) : 0.0 - 15.0

|   | Observed m/z | Int%  | Err [ppm / mmu] | U.S. | Composition |
|---|--------------|-------|-----------------|------|-------------|
| 1 | 168.0658     | 79.68 | -1.6 / -0.3     | 4.5  | C8 H10 N O3 |
| 2 |              |       | +14.3 / +2.4    | 0.0  | C5 H12 O6   |

**Figure S1.** CIMS and HRCIMS spectra of compound **6** in CDCl<sub>3</sub>.

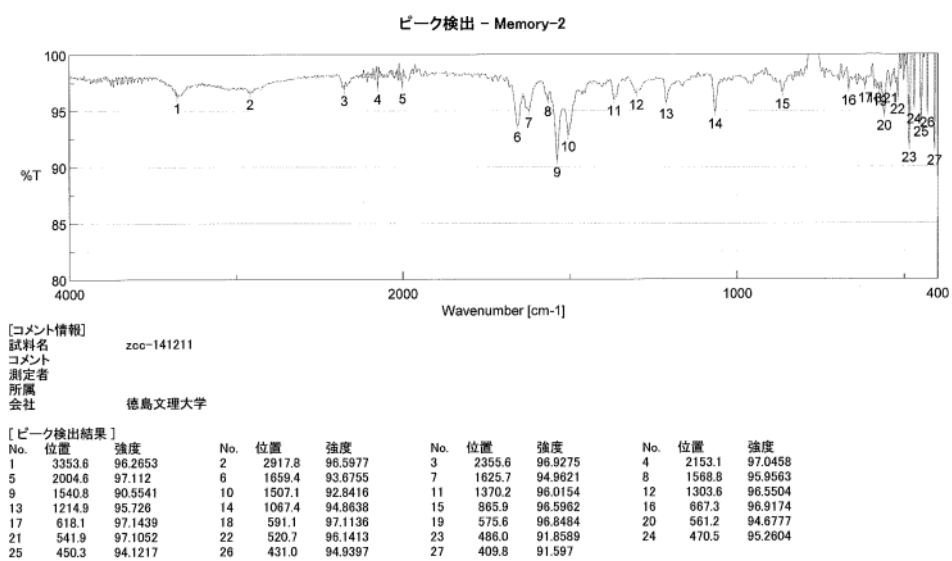

Figure S2. IR spectra of compound 6 in CDCl<sub>3</sub>.















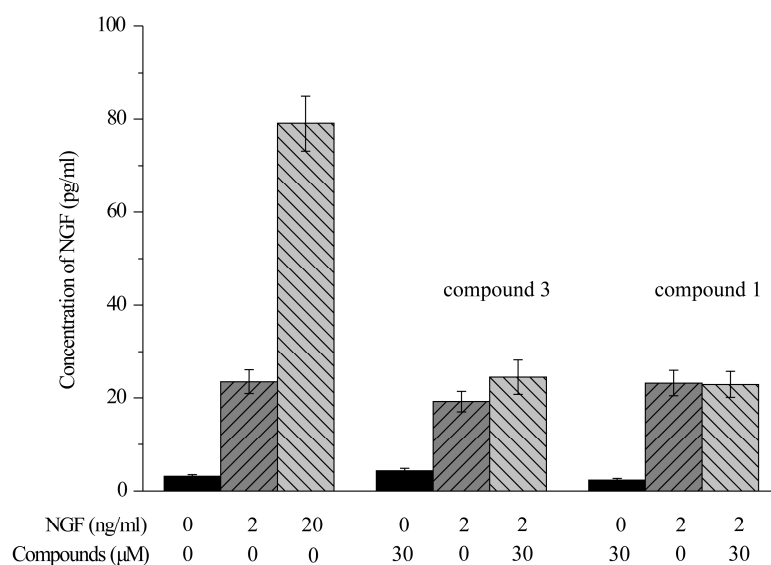

**Figure S9.** Effects of compounds **1** and **3** on the stimulation of NGF secretion in PC12 cells. PC12 cells were incubated with 30  $\mu$ M compounds with or without NGF (2 ng/mL) for 96 h and then the NGF level in the conditioned medium was measured by NGF beta rat ELISA Kit (Thermo Fisher Scientific Inc.: Waltham, MS, USA) following the manufacturer's instructions. Recombinant rat beta-NGF was used as standards.
